# Supplementary material for: Extraction of Polyphenols and Synthesis of New Activated Carbon from Spent Coffee Grounds
Source: Preprints.org preprint supplement (doi:10.20944/preprints201908.0093.v2), 2019-09-20
Supplement: Supplementary file 1 [file supplementary]

**Table S4**. Fitted parameter values obtained from the linear mathematical model described in Equation (1) for the extraction of polyphenols.

| **Compound** | **β0** | **β1** | **β2** | **β3** | **β12** | **β13** | **β23** | **R2** |
| --- | --- | --- | --- | --- | --- | --- | --- | --- |
| **Caffeine** | 0.473 | 0.1634  (0.2063) | 0.0233 (0.7436) | 0.0856  (0.3628) | 0.0428 (0.5778) | 0.0551 (0.4986) | -0.0423 (0.5814) | 0.932 |
| **Cafeic acid** | 0.204 | 0.0828  (0.0182) | -0.0114  (0.1310) | 0.0774  (0.0195) | -0.0011  (0.7184) | -0.0434  (0.0348) | -0.0126  (0.1184) | 0.999 |
| ***trans*-Ferulic acid** | 0.055 | 0.013  (0.2230) | -0.0065  (0.4018) | 0.0047  (0.5000) | 0.0025  (0.6916) | 0.0043  (0.5353) | -0.0033  (0.6180) | 0.923 |
| **Rutin** | 0.061 | 0.008  (0.0397) | 0.0097  (0.0326) | 0.00375  (0.0844) | -0.0023  (0.1392) | -0.0007  (0.3743) | -0.003  (0.1051) | 0.999 |
| **Naringin** | 0.091 | 0.0009  (0.5792) | 0.0096  (0.0741) | 0.0054  (0.1313) | 0.00187  (0.3440) | -0.00537  (0.1313) | 0.0004  (0.7952) | 0.992 |
| **Resveratrol** | 0.062 | 0.0027  (0.1695) | 0.0025  (0.1855) | 0.0035  (0.1344) | -0.0007  (0.5000) | 0.0007  (0.5000) | 0.002  (0.2284) | 0.982 |
| **Kaempferol** | 0.018 | 0.0  (1.000) | 0.0  (1.000) | -0.005  (0.5000) | 0.005  (0.500) | 0.0  (1.000) | 0.0  (1.000) | 0.667 |

Values of *p* are given in parentheses (*p* ≥ 0.05 indicating the effects not significantly different at the 95% confidence level).
