# Supplementary material for: Extraction of Polyphenols and Synthesis of New Activated Carbon from Spent Coffee Grounds
Source: Preprints.org preprint supplement (doi:10.20944/preprints201908.0093.v2), 2019-09-20
Supplement: Supplementary file 2 [file Table S1.docx]

**Table S1**. Plan of experiments for the two-level factorial design aimed to optimization of polyphenol extraction conditions. Normalized factors are indicated in parenthesis.

|  | **Factors** | | |
| --- | --- | --- | --- |
| **Experiment**  **Number** | **Extraction solvent**  **(EtOH:H2O, v/v)** | **Extraction time (min)** | **Temperature**  **(ºC)** |
| 1 | 50:50 (1) | 30 (1) | 120 (1) |
| 2 | 50:50 (1) | 30 (1) | 80 (-1) |
| 3 | 50:50 (1) | 15 (-1) | 120 (1) |
| 4 | 50:50 (1) | 15 (-1) | 80 (-1) |
| 5 | 30:70 (-1) | 30 (1) | 120 (1) |
| 6 | 30:70 (-1) | 30 (1) | 80 (-1) |
| 7 | 30:70 (-1) | 15 (-1) | 120 (1) |
| 8 | 30:70 (-1) | 15 (-1) | 80 (-1) |
| 9 | 40:60 (0) | 23 (0) | 100 (0) |
| 10 | 40:60 (0) | 23 (0) | 100 (0) |
| 11 | 40:60 (0) | 23 (0) | 100 (0) |
