# Supplementary material for: Extraction of Polyphenols and Synthesis of New Activated Carbon from Spent Coffee Grounds
Source: Preprints.org preprint supplement (doi:10.20944/preprints201908.0093.v2), 2019-09-20
Supplement: Supplementary file 3 [file Table S2.docx]

**Table S2**. Plan of experiments for the two-level factorial design for obtaining activated carbon from the solid residue recovered after polyphenol extraction.

|  | **Factors** | | |
| --- | --- | --- | --- |
| **Experiment**  **Number** | **Time**  **(min)** | **Temperature**  **(ºC)** | **Ratio of KOH:precursor** |
| 1 | 30 (-1) | 700 (-1) | 1.5:1 (-1) |
| 2 | 30 (-1) | 700 (-1) | 2.5:1 (1) |
| 3 | 30 (-1) | 850 (1) | 1.5:1 (-1) |
| 4 | 30 (-1) | 850 (1) | 2.5:1 (1) |
| 5 | 60 (1) | 700 (-1) | 1.5:1 (-1) |
| 6 | 60 (1) | 700 (-1) | 2.5:1 (1) |
| 7 | 60 (1) | 850 (1) | 1.5:1 (-1) |
| 8 | 60 (1) | 850 (1) | 2.5:1 (1) |
| 9 | 45 (0) | 775 (0) | 2:1 (0) |
| 10 | 45 (0) | 775 (0) | 2:1 (0) |
| 11 | 45 (0) | 775 (0) | 2:1 (0) |

Normalized factors are indicated in parenthesis.
