# Supplementary material for: Extraction of Polyphenols and Synthesis of New Activated Carbon from Spent Coffee Grounds
Source: Preprints.org preprint supplement (doi:10.20944/preprints201908.0093.v2), 2019-09-20
Supplement: Supplementary file 4 [file Table S3.docx]

**Table S3.** Phenolic compounds extracted from spent coffee grounds.

|  | **Experimental design number** | | | | | | | | | | | | |
| --- | --- | --- | --- | --- | --- | --- | --- | --- | --- | --- | --- | --- | --- |
| **Compound**  **(mg∙g-1)*** | **tR (min)** | **1** | **2** | **3** | **4** | **5** | **6** | **7** | **8** | **9** | **10** | **11** |
| Caffeine | 7.2 | 0.420 | 0.469 | 0.333 | 0.450 | 0.449 | 1.090 | 0.890 | 1.008 | 0.966 | 1.241 | 0.963 |
| Cafeic acid | 7.7 | n.d | 0.354 | n.d | 0.299 | 0.337 | 0.469 | 0.344 | 0.396 | 0.429 | n.d | 0.439 |
| *trans*- Ferulic acid | 12.2 | 0.071 | 0.067 | 0.042 | 0.047 | 0.074 | 0.121 | 0.084 | 0.088 | 0.095 | 0.073 | 0.097 |
| Rutin | 13.6 | 0.045 | 0.066 | 0.087 | 0.089 | 0.075 | 0.090 | 0.103 | 0.104 | 0.082 | 0.065 | 0.085 |
| Naringin | 14.4 | 0.096 | 0.127 | 0.119 | 0.145 | 0.110 | 0.107 | 0.138 | 0.142 | 0.092 | 0.089 | 0.103 |
| Resveratrol | 16.2 | 0.075 | 0.075 | 0.077 | 0.092 | 0.081 | 0.089 | 0.083 | 0.097 | 0.057 | 0.044 | 0.058 |
| Kaempferol | 19.7 | LOD | LOD | LOD | 0.004 | LOD | 0.004 | LOD | LOD | LOD | LOD | LOD |

* Extracted amounts are expressed as mg per gram of dried sample. LOD: determined at the levels of the method detection limit, n.d: no detected.
