# Supplementary material for: Extraction of Polyphenols and Synthesis of New Activated Carbon from Spent Coffee Grounds
Source: Preprints.org preprint supplement (doi:10.20944/preprints201908.0093.v2), 2019-09-20
Supplement: Supplementary file 6 [file Table S5.docx]

**Table S5**. Fitted parameter values obtained from the linear mathematical model described in Equation (1) for activated carbon.

| **Compound** | **β0** | **β1** | **β2** | **β3** | **β12** | **β13** | **β23** | **R2** |
| --- | --- | --- | --- | --- | --- | --- | --- | --- |
| **Vporos** | 0.8589 | 0.1997  (0.1925) | -0.0564  (0.5316) | 0.0386  (0.6466) | 0.0349 (0.6744) | 0.0452 (0.6002) | -0.0194 (0.8075) | 0.926 |
| **W0** | 0.7777 | 0.1704  (0.1928) | -0.0369  (0.6140) | 0.0194  (0.7770) | 0.02338  (0.7365) | 0.0483  (0.5310) | -0.0232  (0.7382) | 0.923 |
| ***L0*** | 1.8467 | 0.2087  (0.0875) | -0.0433  (0.3740) | 0.0693  (0.2511) | 0.0384  (0.4104) | 0.0221  (0.5845) | 0.0367  (0.4245) | 0.985 |
| **Smi** | 1775.43 | 213.464  (0.2406) | -84.426  (0.5013) | 8.3869  (0.9372) | 46.0374  (0.6833) | 66.2872  (0.5775) | -95.1131  (0.4634) | 0.905 |
| **Se** | 54.6722 | 162.008  (0.3176) | -8.3373  (0.5182) | 11.9603  (0.4048) | 3.4779  (0.7611) | 0.4868  (0.9649) | 7.460  (0.5518) | 0.8746 |
| **SBET** | 1885.71 | 171.983  (0.4591) | -148.444  (0.5059) | 75.954  (0.7036) | 107.122  (0.6076) | 11.0928  (0.9534) | -145.298  (0.5127) | 0.798 |

Values of *p* are given in parentheses (*p* ≥ 0.05 indicating the effects not significantly different at the 95% confidence level).
