# Supplementary material for: Extraction of Polyphenols and Synthesis of New Activated Carbon from Spent Coffee Grounds
Source: Preprints.org preprint supplement (doi:10.20944/preprints201908.0093.v2), 2019-09-20
Supplement: Supplementary file 7 [file Table S6.docx]

**Table S6.** Porosity features of the activated carbons

| Experiment  number | Total Pore Volume (Vp)  (cm3∙g) | Volume of micropores (Wo)  (cm3∙g) | Average Micropore Size (Lo)  (nm) | Microporous Surface (Smi)  (m2∙g) | Non-microporous Surface (Se)  (m2∙g) | SBET  (m2∙g) |
| --- | --- | --- | --- | --- | --- | --- |
| AC-SCG-1 | 0.675 | 0.620 | 1.680 | 1570.451 | 37.481 | 1607.932 |
| AC-SCG-2 | 0.826 | 0.715 | 1.759 | 1814.409 | 63.092 | 1877.501 |
| AC-SCG-3 | 1.168 | 1.067 | 2.005 | 2265.062 | 65.591 | 2330.653 |
| AC-SCG-4 | 0.992 | 0.856 | 2.115 | 1789.504 | 85.874 | 1867.378 |
| AC-SCG-5 | 0.527 | 0.509 | 1.531 | 1346.483 | 30.533 | 1377.016 |
| AC-SCG-6 | 0.609 | 0.585 | 1.582 | 1516.526 | 22.780 | 1539.305 |
| AC-SCG-7 | 0.911 | 0.837 | 1.894 | 1886.180 | 37.243 | 1923.423 |
| AC-SCG-8 | 1.164 | 1.032 | 2.207 | 2014.834 | 94.785 | 2109.321 |
| AC-SCG-9 | 0.675 | 0.628 | 1.687 | 1575.276 | 26.765 | 1602.040 |
